# Supplementary material
Source: Springer Nature journal article supplement (https://www.springermedizin.de/resource/supplementary/12885_2008_1371_MOESM2_ESM.pdf/9472704)

Cumulative Probability of Survival

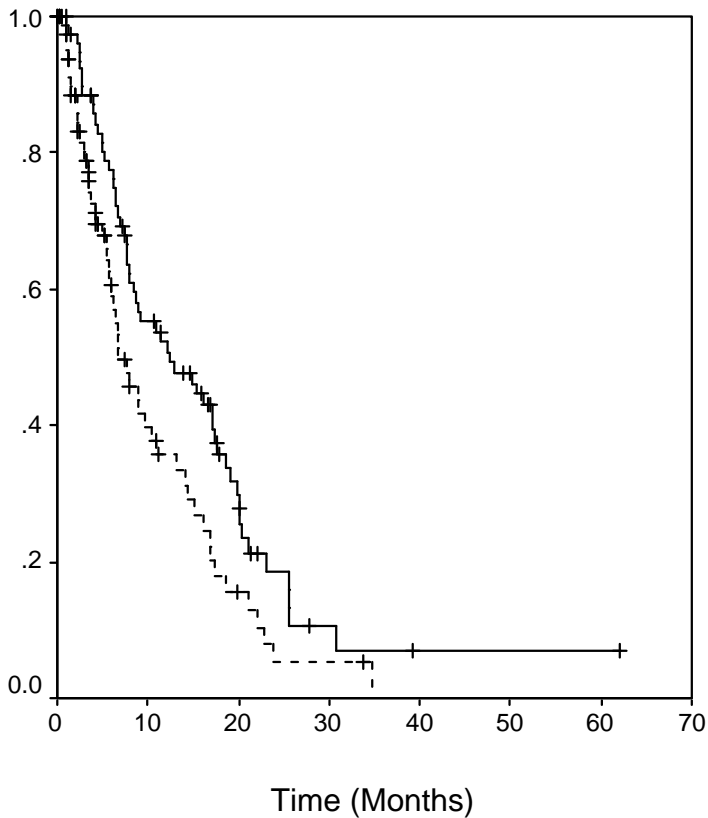

N = 165

- High Phase Angle
- + censored
- - - Low Phase Angle
- + censored

Supplement: MOESM2 [file 9472704]
